# Supplementary material for: LV305, a dendritic cell-targeting integration-deficient ZVexTM-based lentiviral vector encoding NY-ESO-1, induces potent anti-tumor immune response
Source: PubMed Central journal article supplement — Mol Ther Oncolytics. 2016 Mar 30;3:16010–. doi: 10.1038/mto.2016.10 (PMC5008268; doi:10.1038/mto.2016.10), 2016-03-30

**Figure S1 Determination of the optimal route of administration for LV305. (a)** Female BALB/c mice ( $n = 8$  per group) were injected with  $4 \times 10^{10}$  vector genomes of LV305, SC, in the tail base, scruff of neck, or footpad; ID, in the lower back; IV; or IM. Splenic T cell responses were measured by ICS 14 days later. **(b)** Female BALB/c mice ( $n = 8$  per group) were injected with LV305, SC, in the tail base, at the designated vector genome doses. Splenic T cell responses were measured by ICS 14 days later. Error bars represent mean  $\pm$  SEM; bars represent mean. SC, subcutaneous; ID, intradermal; IV, intravenous; IM, intramuscular; ICS, intracellular cytokine staining; CTL, cytotoxic T lymphocyte; \*\*  $p < 0.005$ ; \*\*\*  $p < 0.0005$ . Data are representative of 2 independent experiments.

**a**

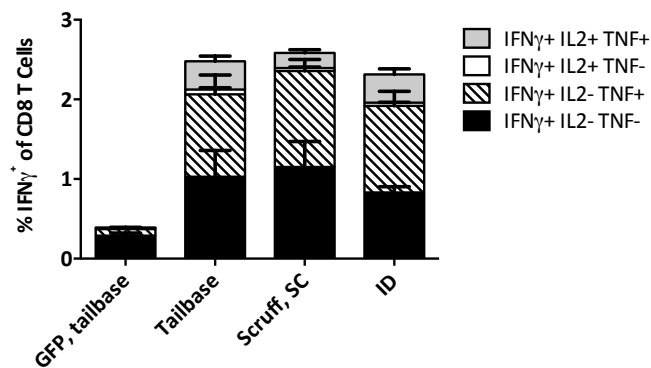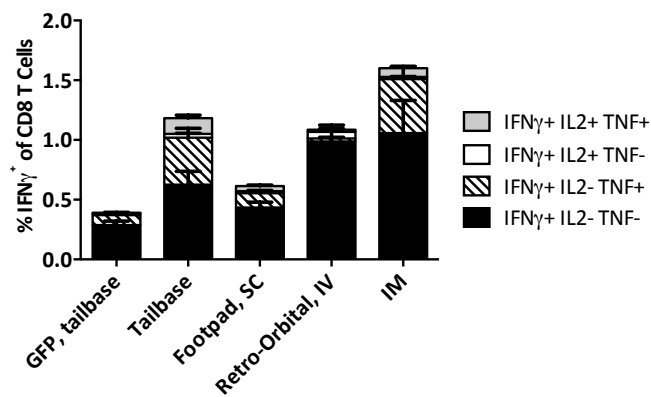

**b**

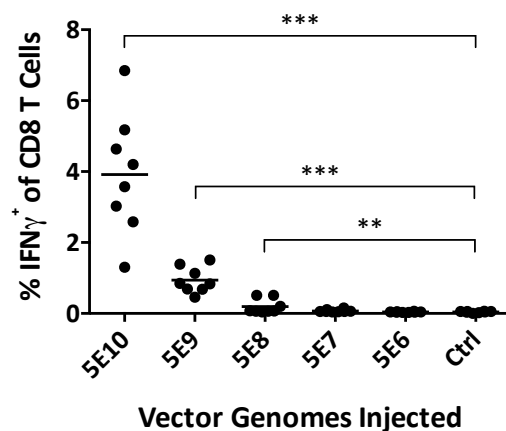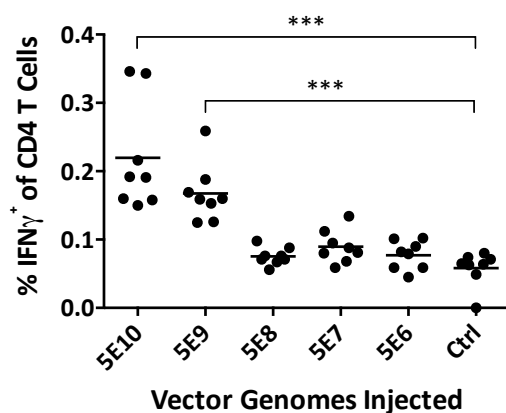

**Figure S2 Generation of CIN.23, a CT26 murine colon cancer cell line that stably expresses human NY-ESO-1 protein.** CT26 cells were transduced with lentiviral vector encoding NY-ESO-1. Transduced cells were serially diluted to near single cell per well of a 96-well plate. Single-cell colonies were stained with anti-NY-ESO-1 antibody to analyze expression of NY-ESO-1 by flow cytometry. Data are representative of at least 3 independent experiments.

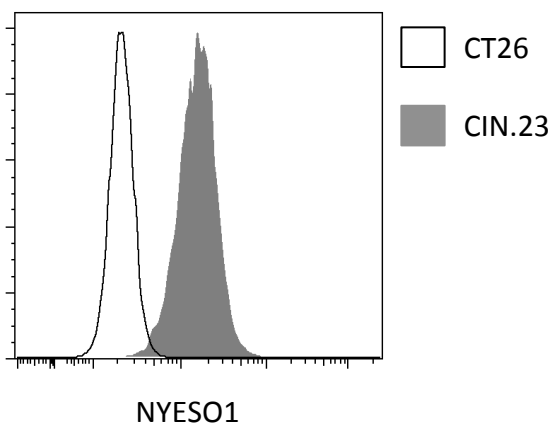

**Figure S3 Adoptive transfer of CD8 T cells, CD4 T cells, or NK cells from LV305-immunized mice mediate anti-tumor immunity.** On Day 0, female BALB/c mice (n = 5 per group) were injected with  $1.5 \times 10^5$  CIN.23 cells, IV. On Day 3, tumor-bearing mice were injected, IV, with  $1.0 \times 10^6$  cells (as designated in the figure) isolated from LV305- or mock-immunized donor mice. On Day 18, **(a)** tumor nodules in lungs were enumerated, and **(b)** splenic T cell responses were measured by ICS. Bars represent mean; error bars represent mean  $\pm$  SEM. IV, intravenous; \*  $p < 0.05$ . Data are representative of 2 independent experiments.

**a**

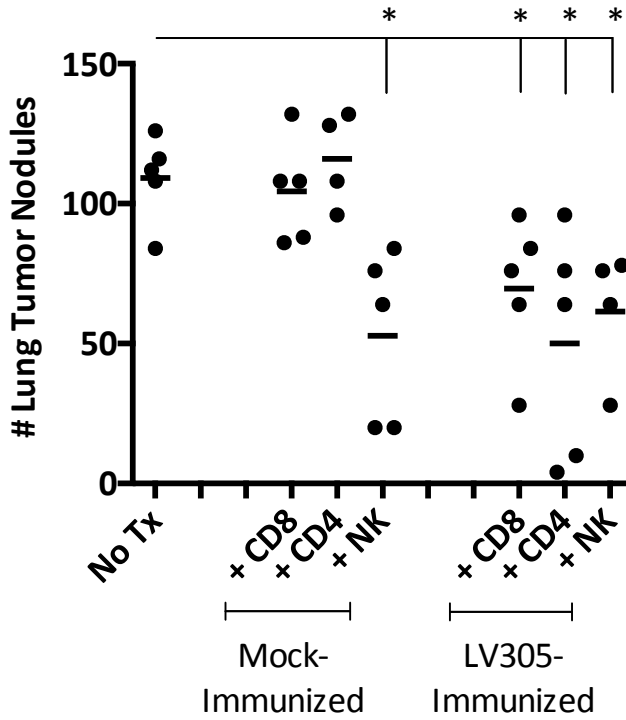

**b**

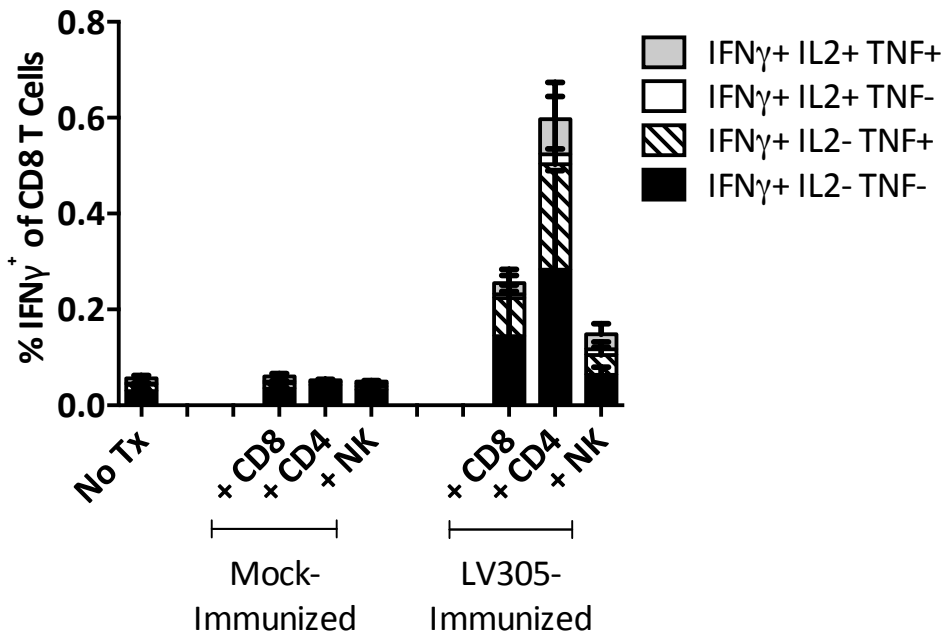

Supplement: mto201610-s1.pdf [file mto201610-s1.pdf]
